# Supplementary material for: Dystrophin and calcium current are decreased in cardiomyocytes expressing Cre enzyme driven by αMHC but not TNT promoter
Source: PubMed Central journal article supplement (PMC6923407; doi:10.1038/s41598-019-55950-w), 2019-12-19

1  
2  
3  
4  
5  
6  
7  
8  
9  
10  
11  
12  
13  
14  
15  
16  
17  
18  
19  
20  
21  
22  
23  
24  
25  
26  
27  
28  
29  
30  
31  
32  
33  
34  
35

**SUPPLEMENTARY INFORMATION**

**Dystrophin and calcium current are decreased in cardiomyocytes  
expressing Cre enzyme driven by  $\alpha$ MHC but not TNT promoter**

Short title:  $\alpha$ MCH-Cre reduces dystrophin expression and calcium current

**Ludovic Gillet<sup>1,2</sup>, Sabrina Guichard<sup>1</sup>, Maria C. Essers<sup>1</sup>, Jean-Sébastien Rougier<sup>1</sup>,  
and Hugues Abriel<sup>1</sup>**

<sup>1</sup>, Ion Channels and Channelopathies Laboratory, Institute for Biochemistry and Molecular Medicine, University of Bern, Switzerland.

<sup>2</sup>, Current address: Roche Diagnostics International Ltd., Rotkreuz, Switzerland.

Correspondence should be addressed to:  
Prof. Dr. Hugues Abriel, University of Bern, Institute of Biochemistry and Molecular Medicine  
Bühlstrasse 28, 3012, Bern, Switzerland  
hugues.abriel@ibmm.unibe.ch  
Phone number: +41 31 631 31 86

36 **Supplemental Figure 1. Generation of the *Dmd*<sup>flox</sup> mouse model.** A) The homology regions  
37 in the wild type (WT), the targeted allele (TG) and the targeted allele after deletion of  
38 neomycin cassette (TGdelneo) are indicated as grey boxes. The elongated homology (SA  
39 elongated 2) is depicted with a white box. Exons are depicted with black arrows. After  
40 homologous recombination, two loxP sites (grey arrows) are inserted into the genome  
41 flanking exon 22 of *Dmd*. Additionally, an FRT flanked neomycin cassette (dashed white  
42 arrow) is inserted downstream of exon 22. This cassette is deleted upon Flp-mediated  
43 recombination, leaving only the proximal loxP and a single FRT site (dashed white arrow)  
44 downstream of exon 22.

45

46 **Supplemental Figure 2. The presence of flox elements in *Dmd*<sup>flox</sup> mouse hearts does not**  
47 **alter the dystrophin expression.** A) Cropped western blots showing the dystrophin  
48 expression in  $\geq 12$ -week-old mouse heart lysates of *Dmd*<sup>flox</sup> mice with Cre recombinase  
49 (MHC-Cre<sup>+</sup>) or without (MHC-Cre<sup>-</sup>). N.B: The “cre blot” shown is similar that the one  
50 presented in figure 4B because the samples loaded are identical and only one blot against Cre  
51 protein has been performed to confirm the presence or not of the Cre recombinase.

52

53 **Supplemental Figure 3.  $I_{CaL}$  are unaltered in dystrophin deficient mouse**  
54 **cardiomyocytes.** A) Quantification of  $I_{CaL}$  show that the calcium current is not changed in  
55 dystrophin deficient cardiomyocytes compared to the wild-type from  $\geq 12$ -week-old mice. n.s.  
56 indicates a non-statistically significant difference.

57

58 **Supplemental Figure 4. In mouse hearts, Cre recombinase under the control of TNT**  
59 **promoter is expressed mainly in new-born mice.** A) Cropped western blots showing the  
60 Cre expression in new-born TNT-Cre mouse heart lysates. B) Cropped western blots showing

61 the absence of Cre recombinase expression in TNT-Cre<sup>+</sup> heart lysates of  $\geq$ 12-week-old mice  
62 compared to MHC-Cre<sup>+</sup> hearts.

63

64 **Data Availability**

65

66 “All data underlying the results are available as part of the article and no additional source

67 data are required.”

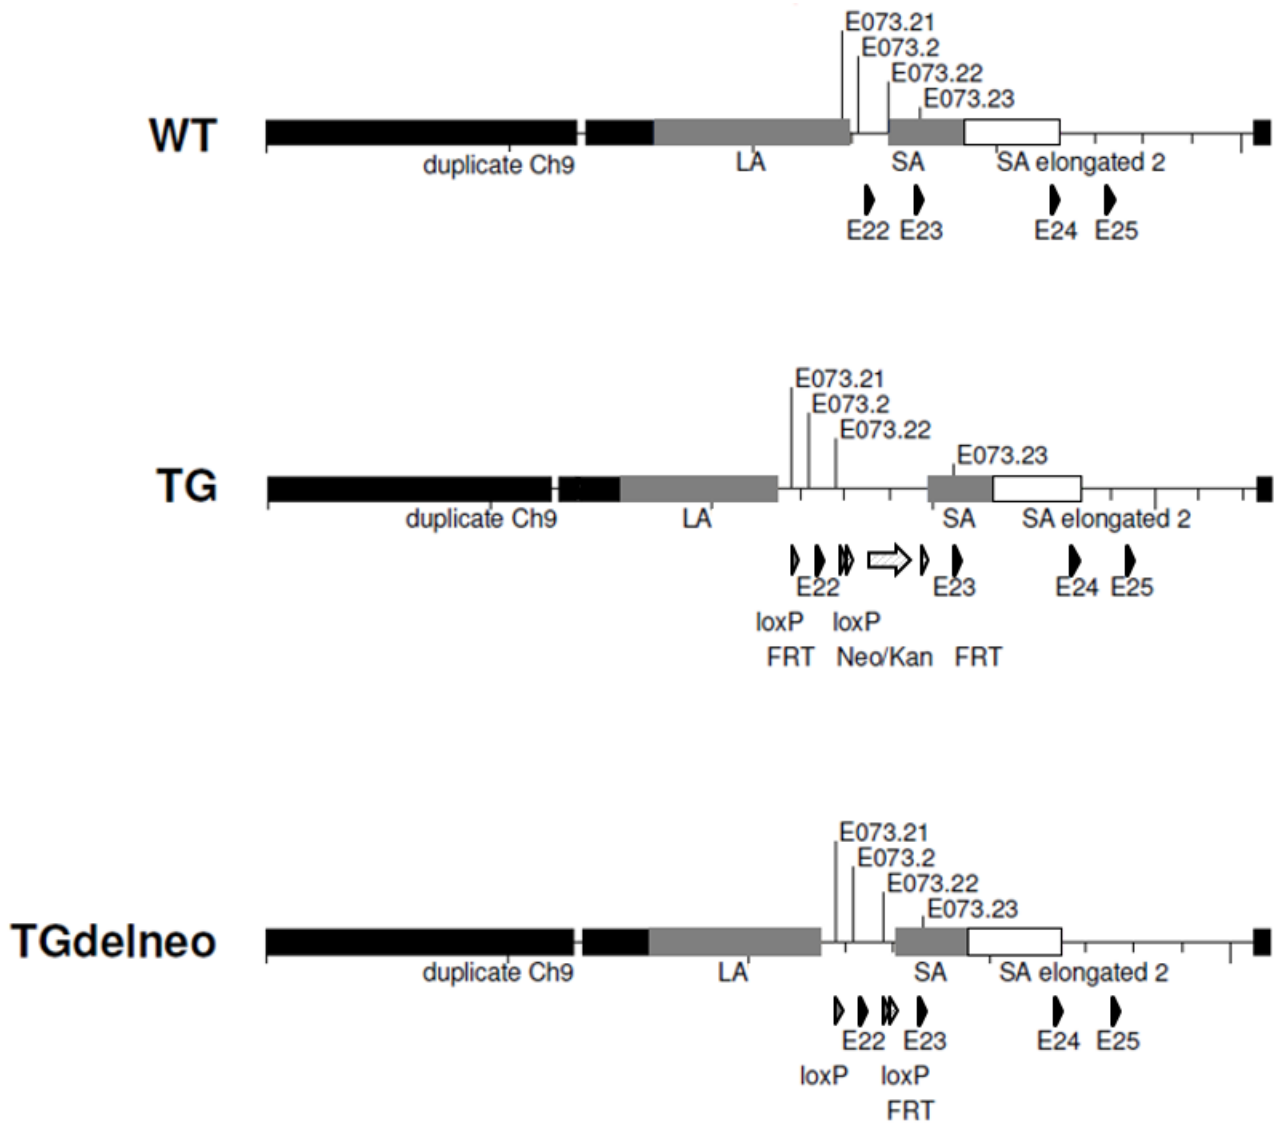

Supplemental Figure 1

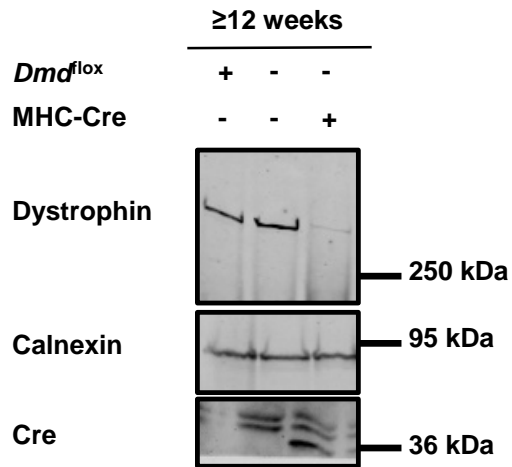

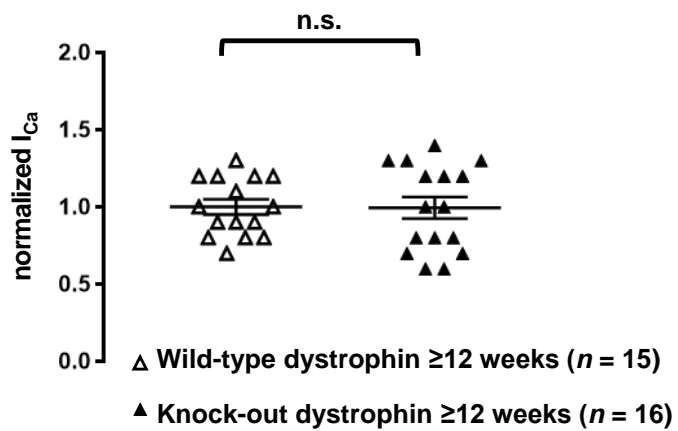

**A**

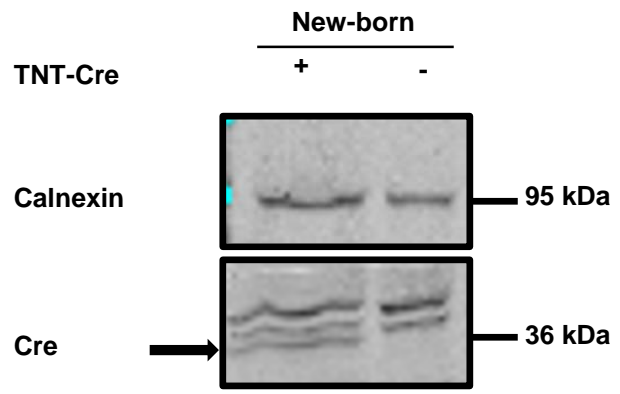

**B**

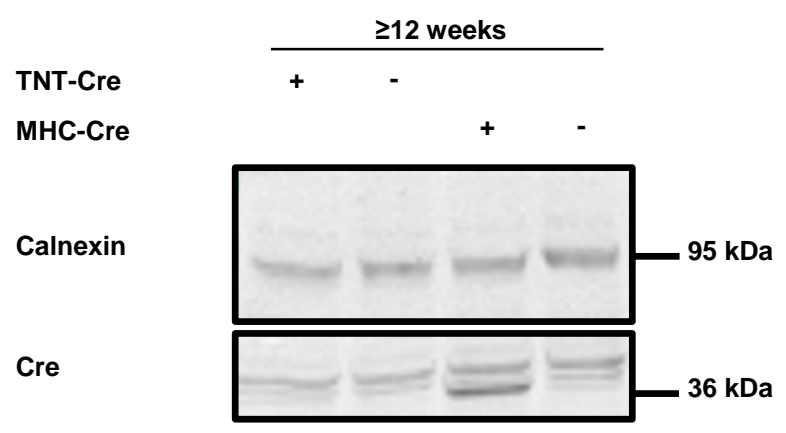

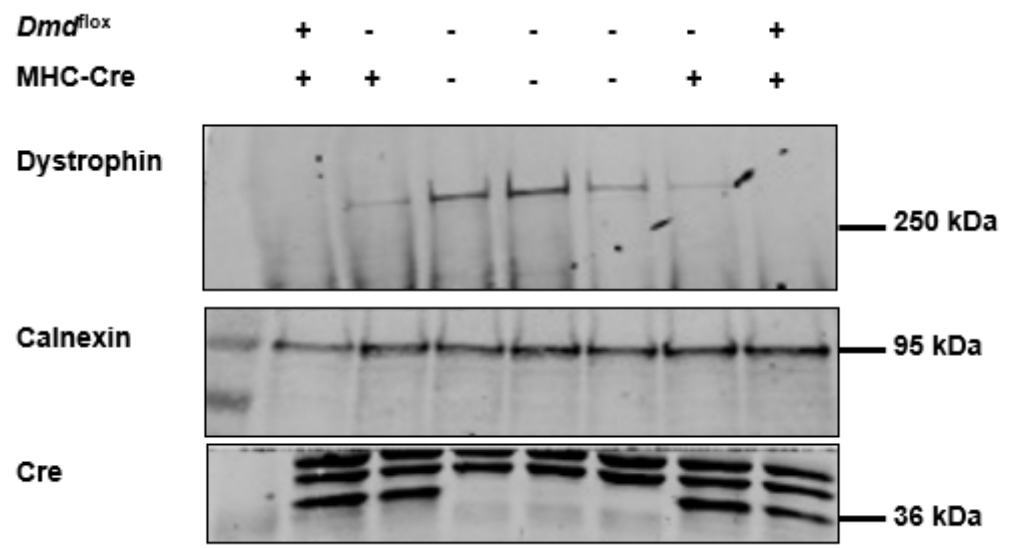

Raw western blot from Figure 1A



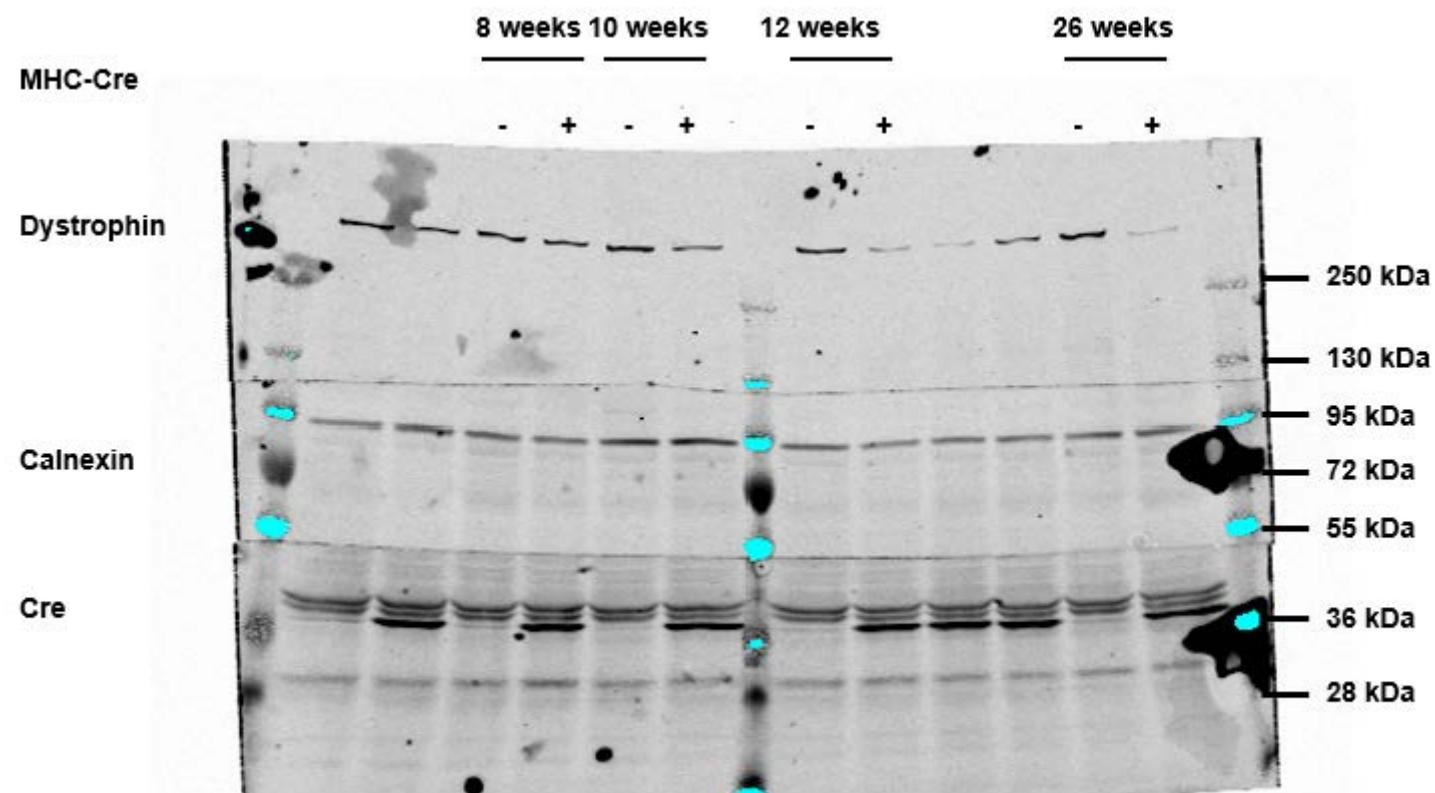

Raw western blot from Figure 1B

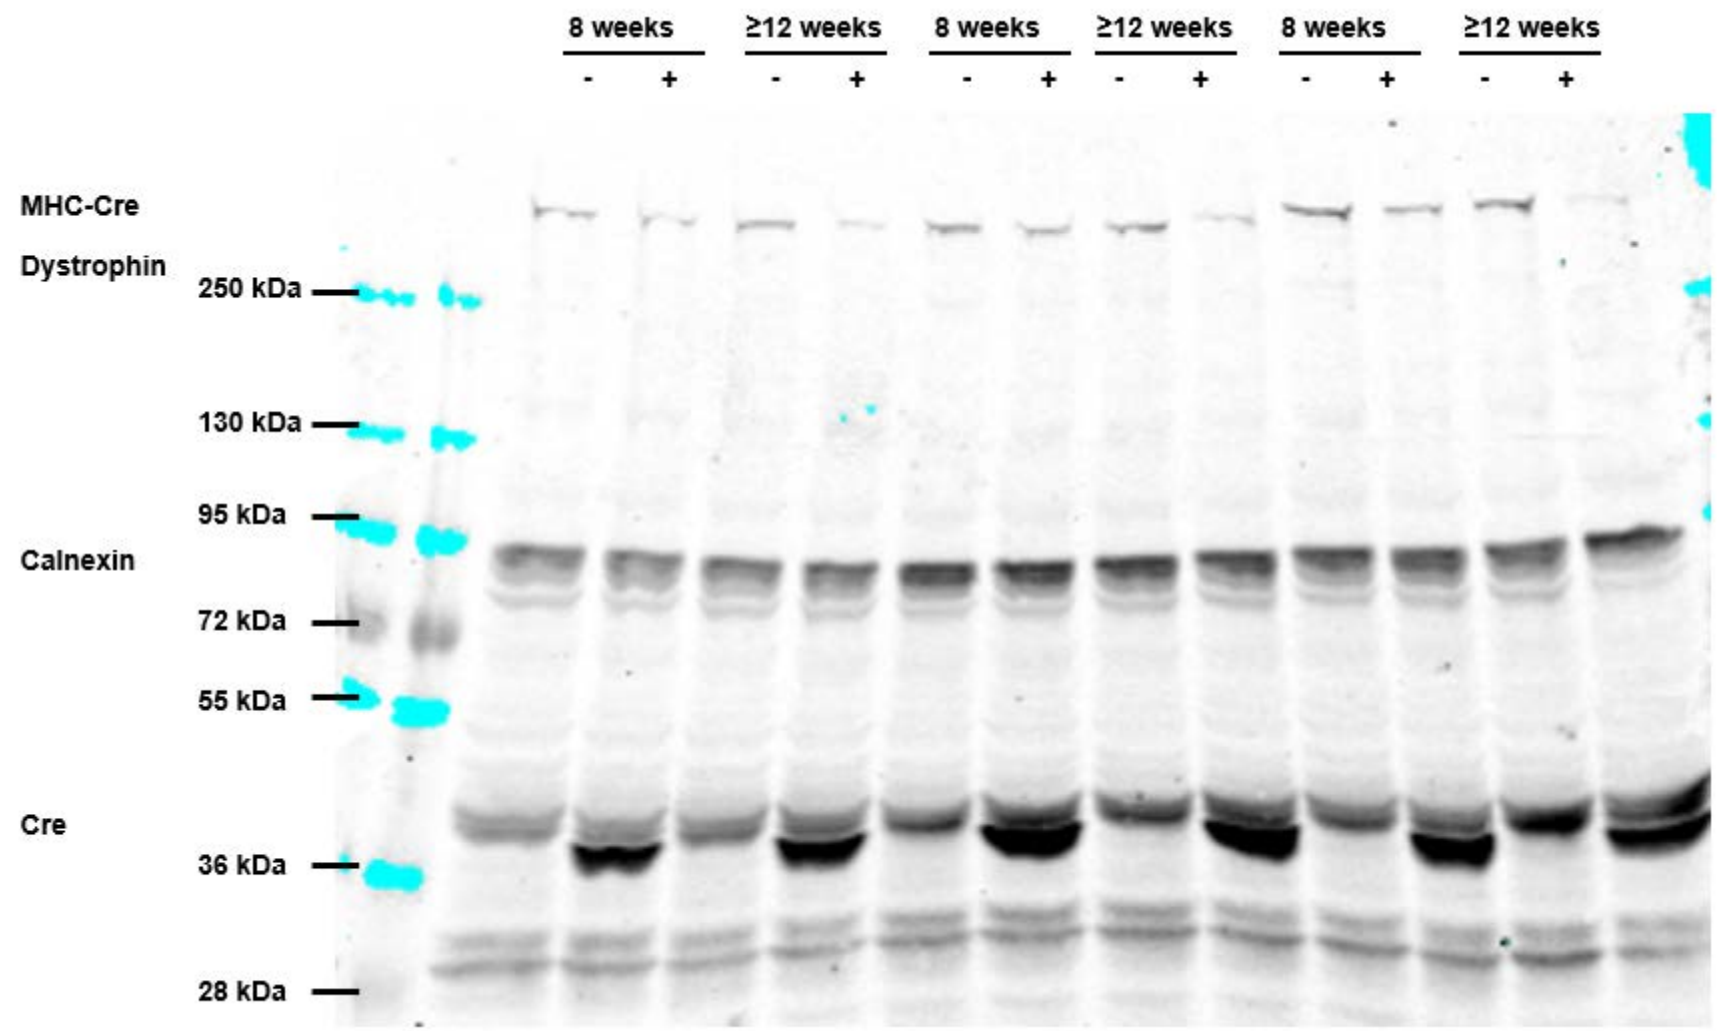

Raw western blot from Figure 2A



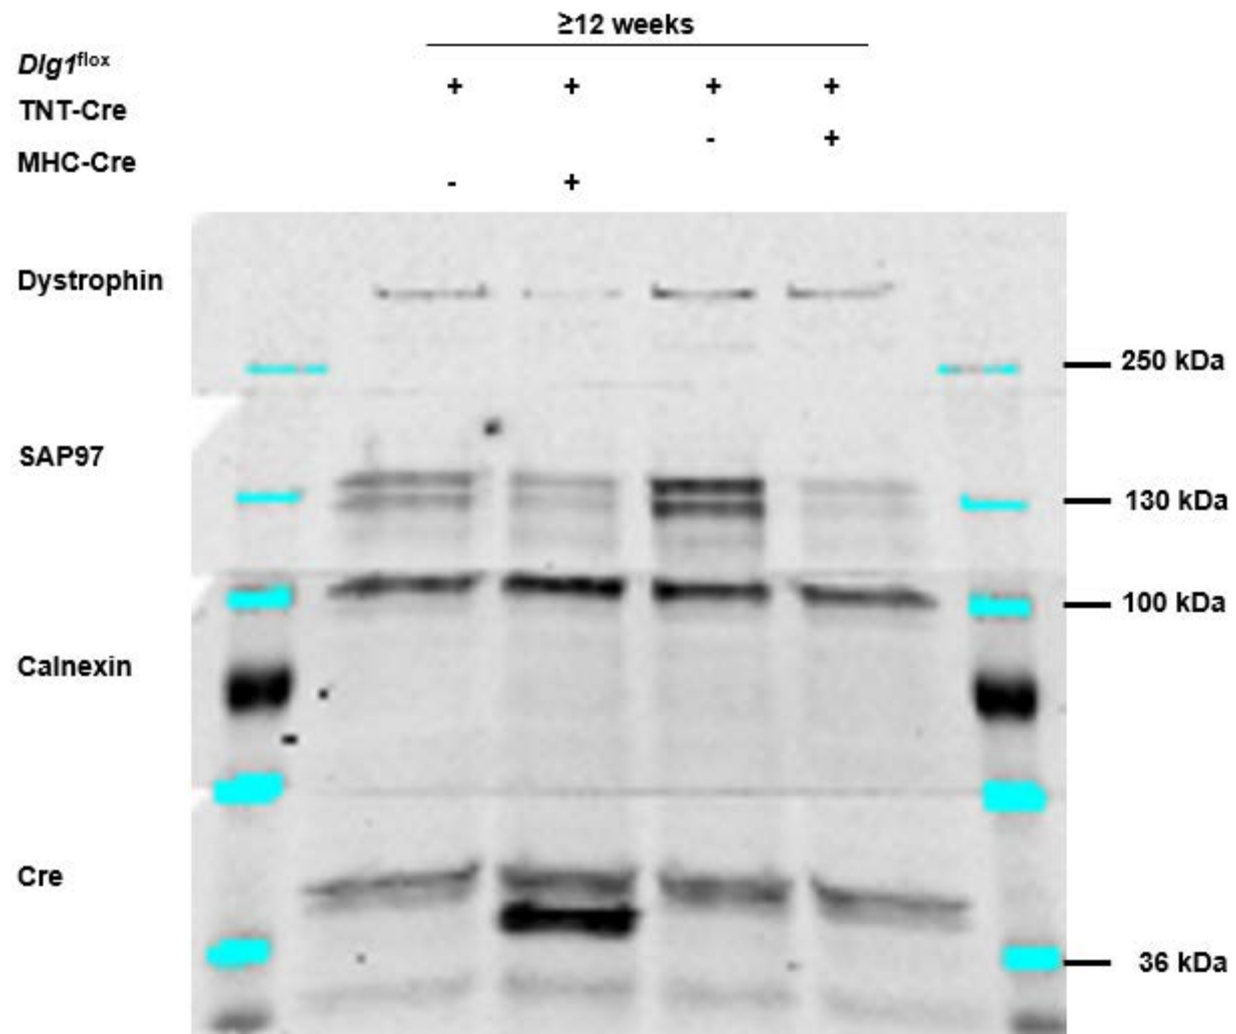

Raw western blot from Figure 5

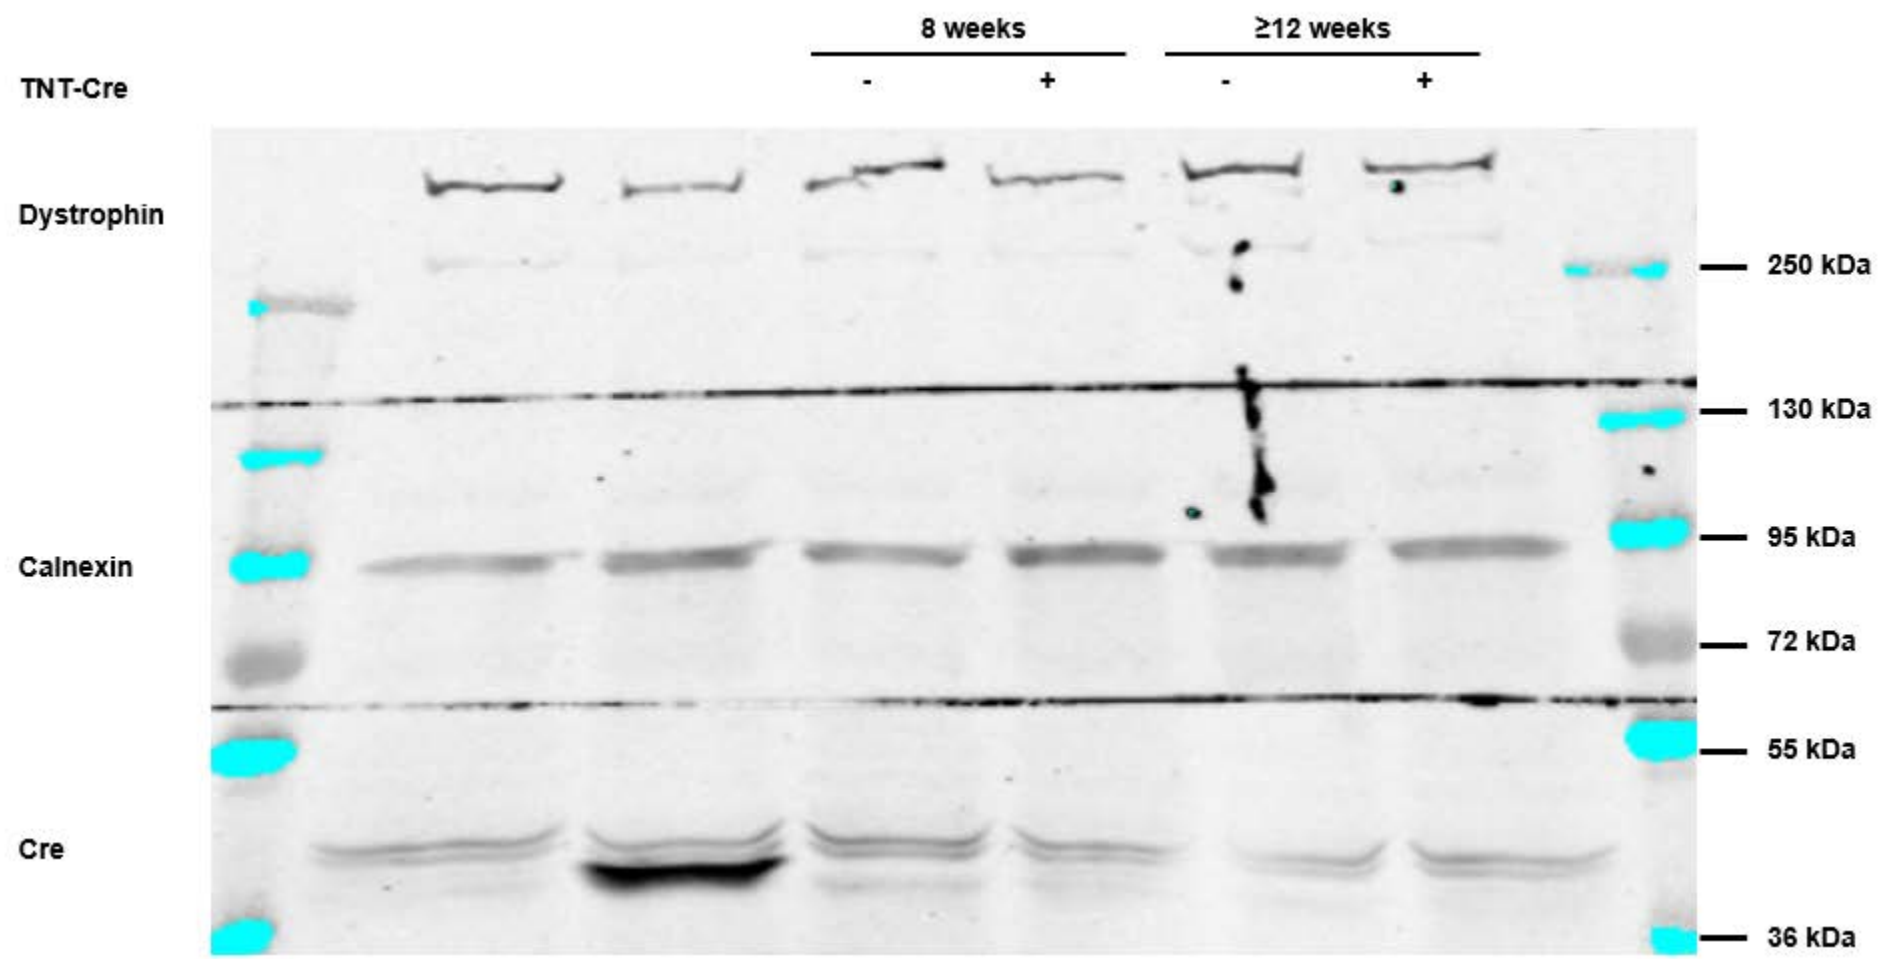

Raw western blot from Figure 6A

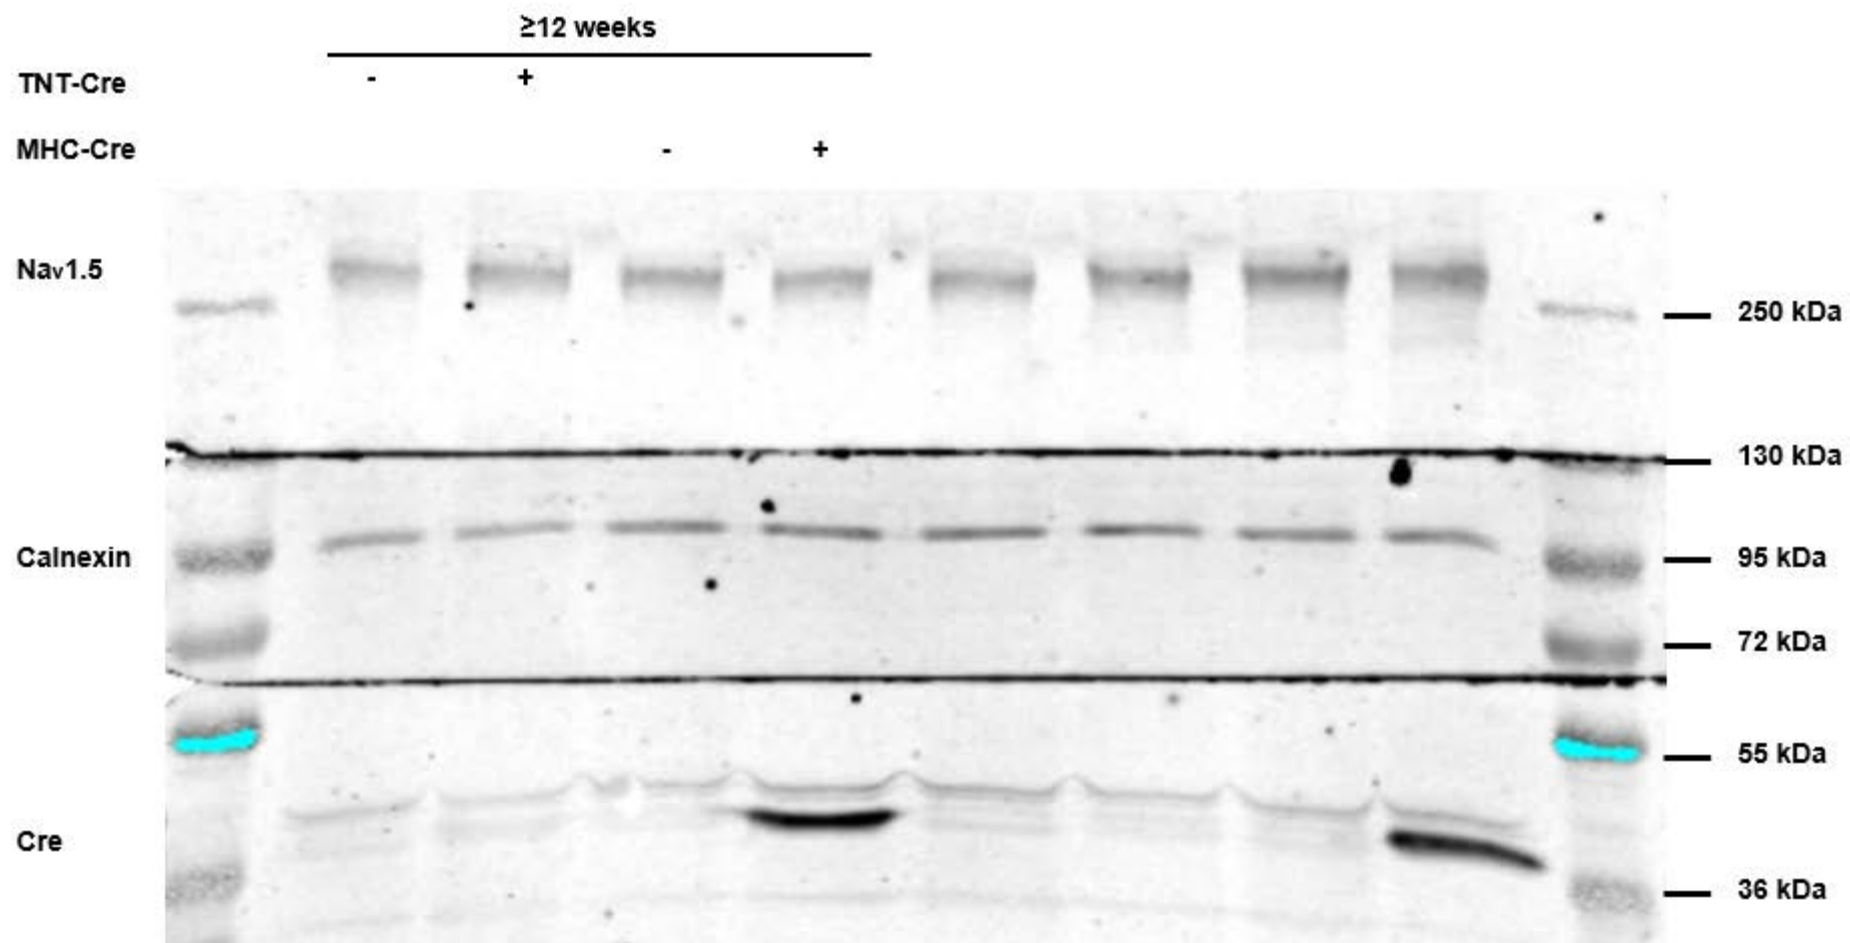

Raw western blot from Figure 7B

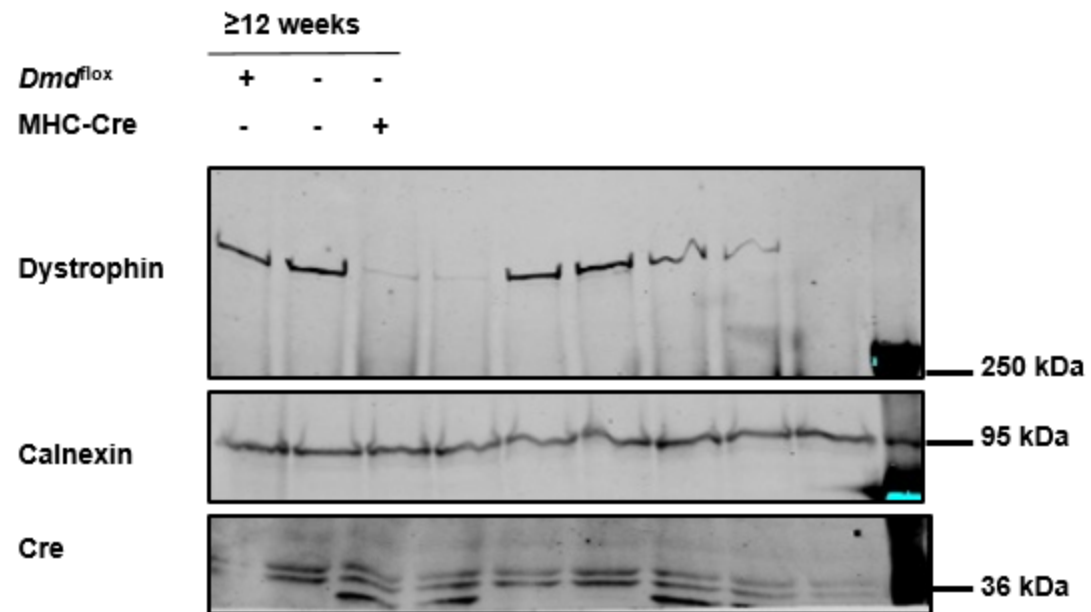

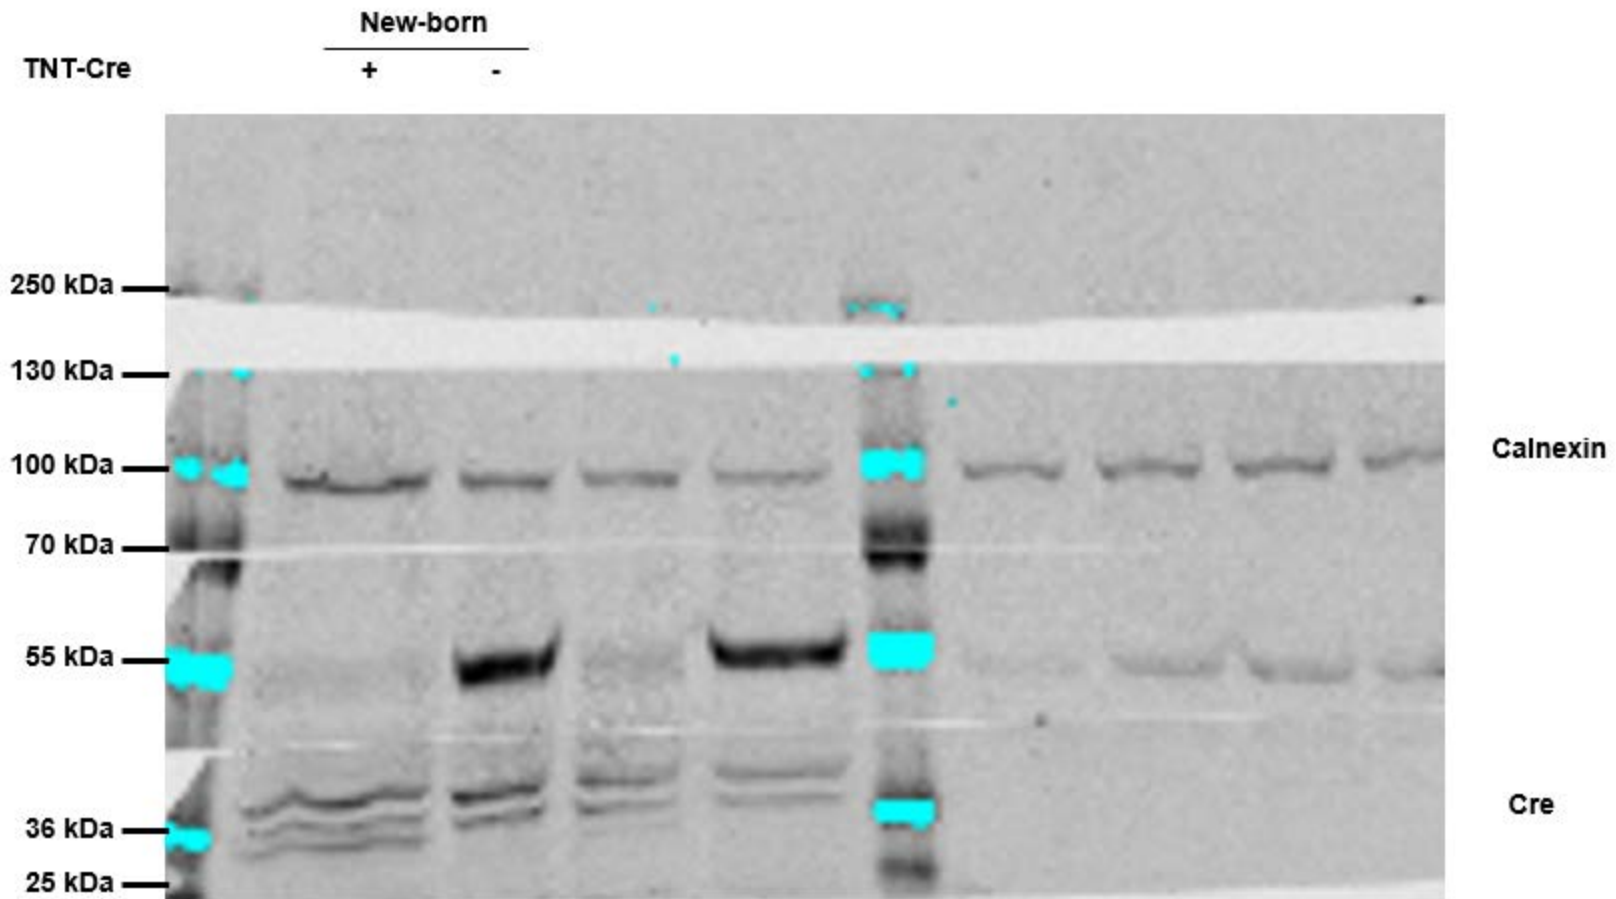

Raw western blot from Supplementary Figure 4A



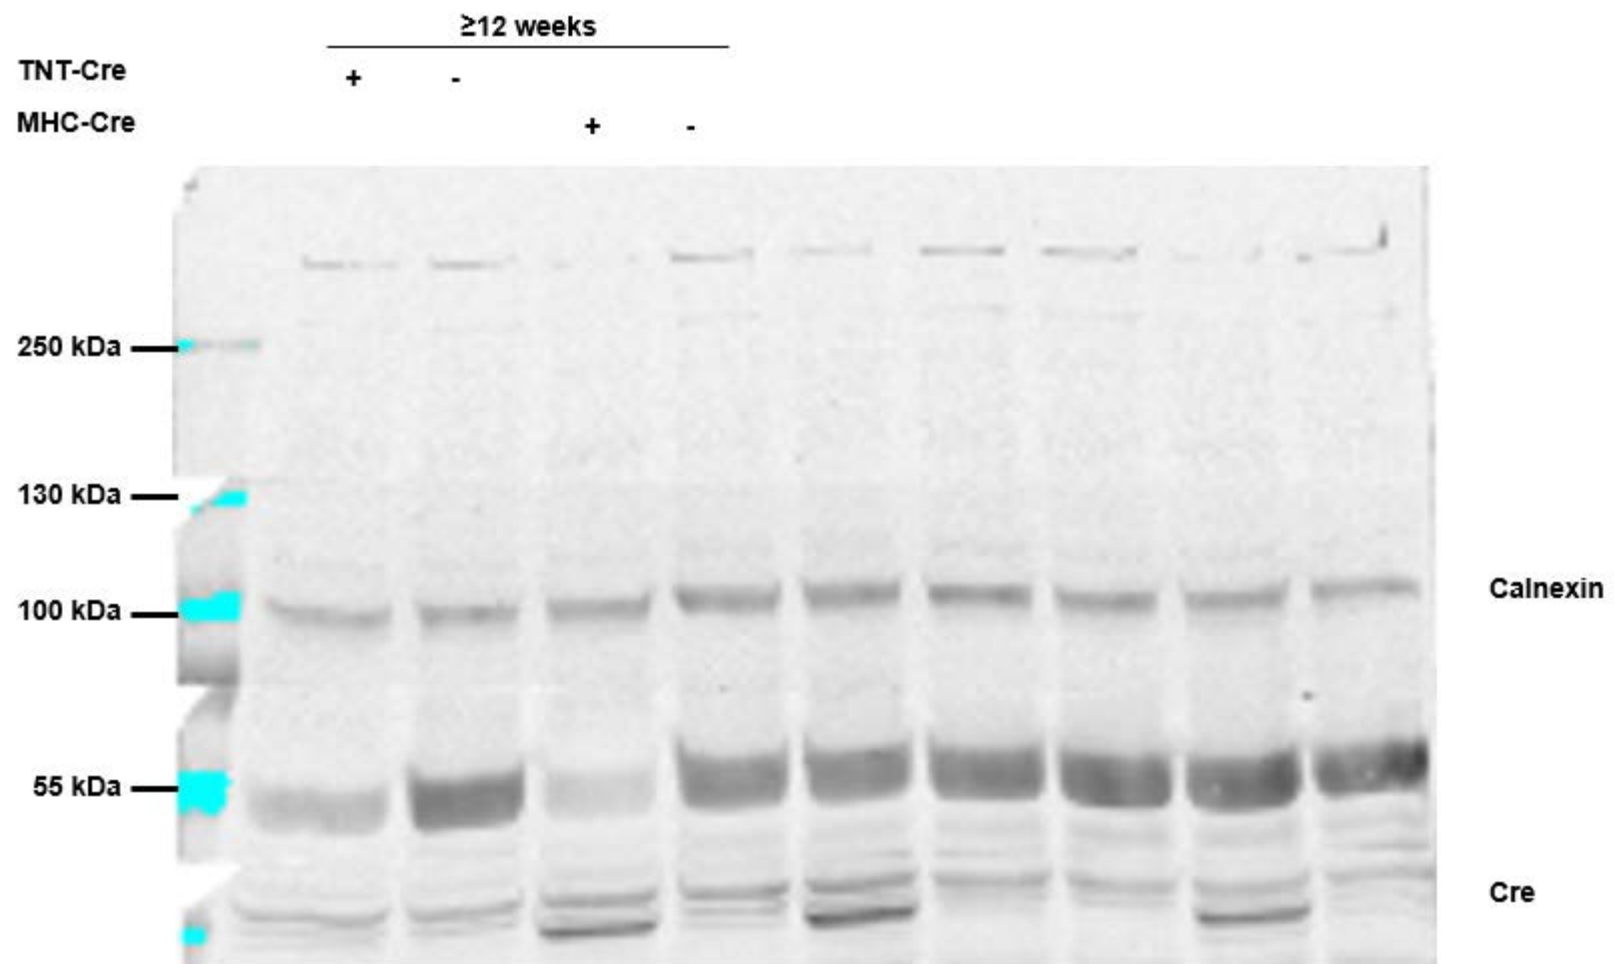

Raw western blot from Supplementary Figure 4B

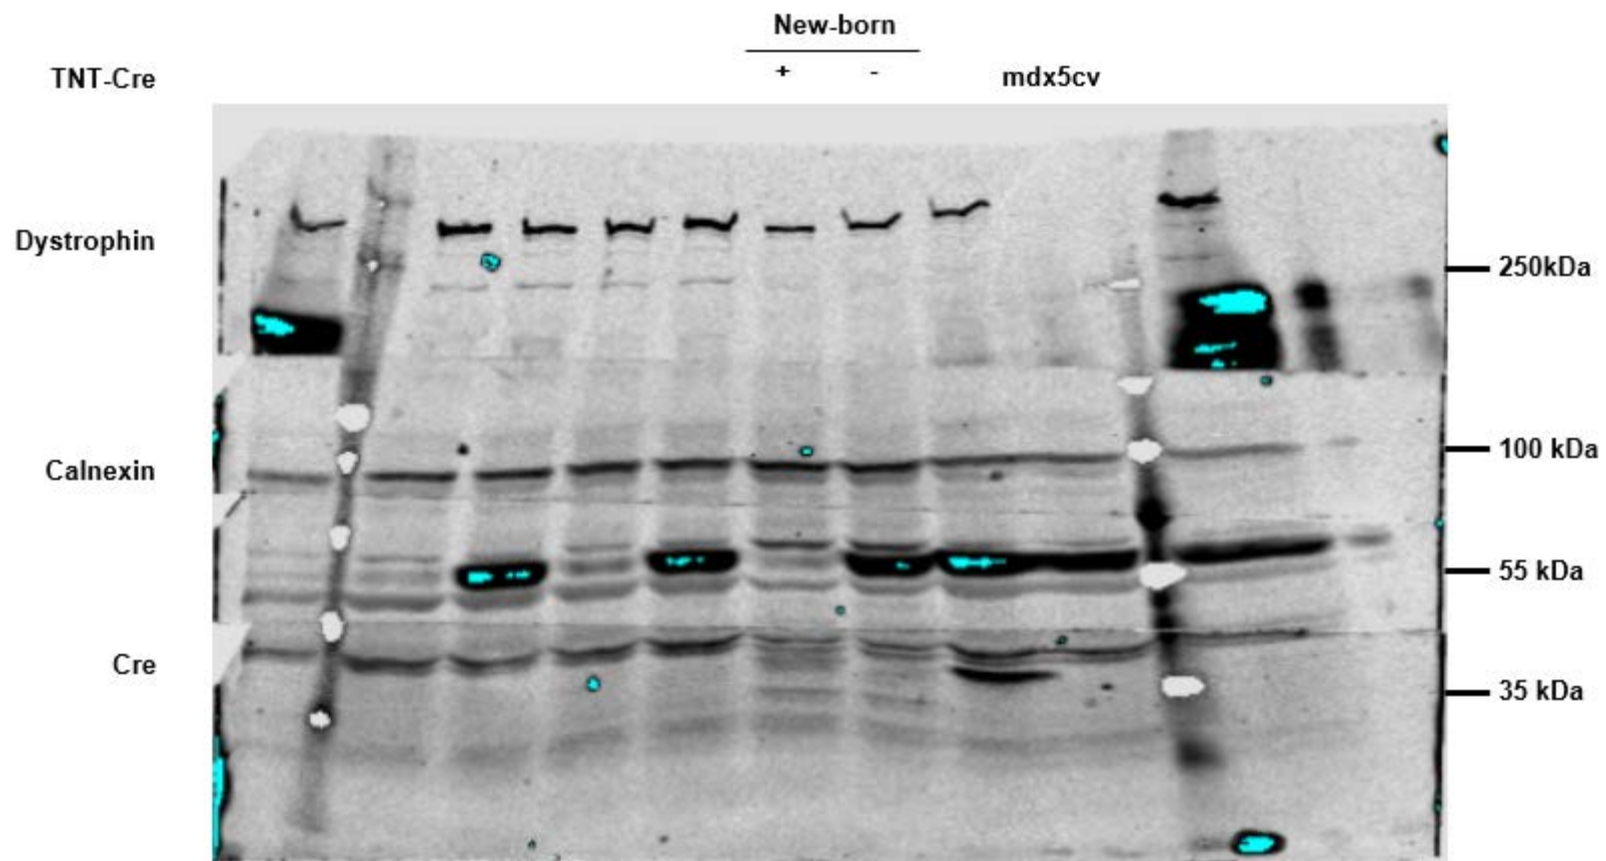

Raw western blot for the reviewer

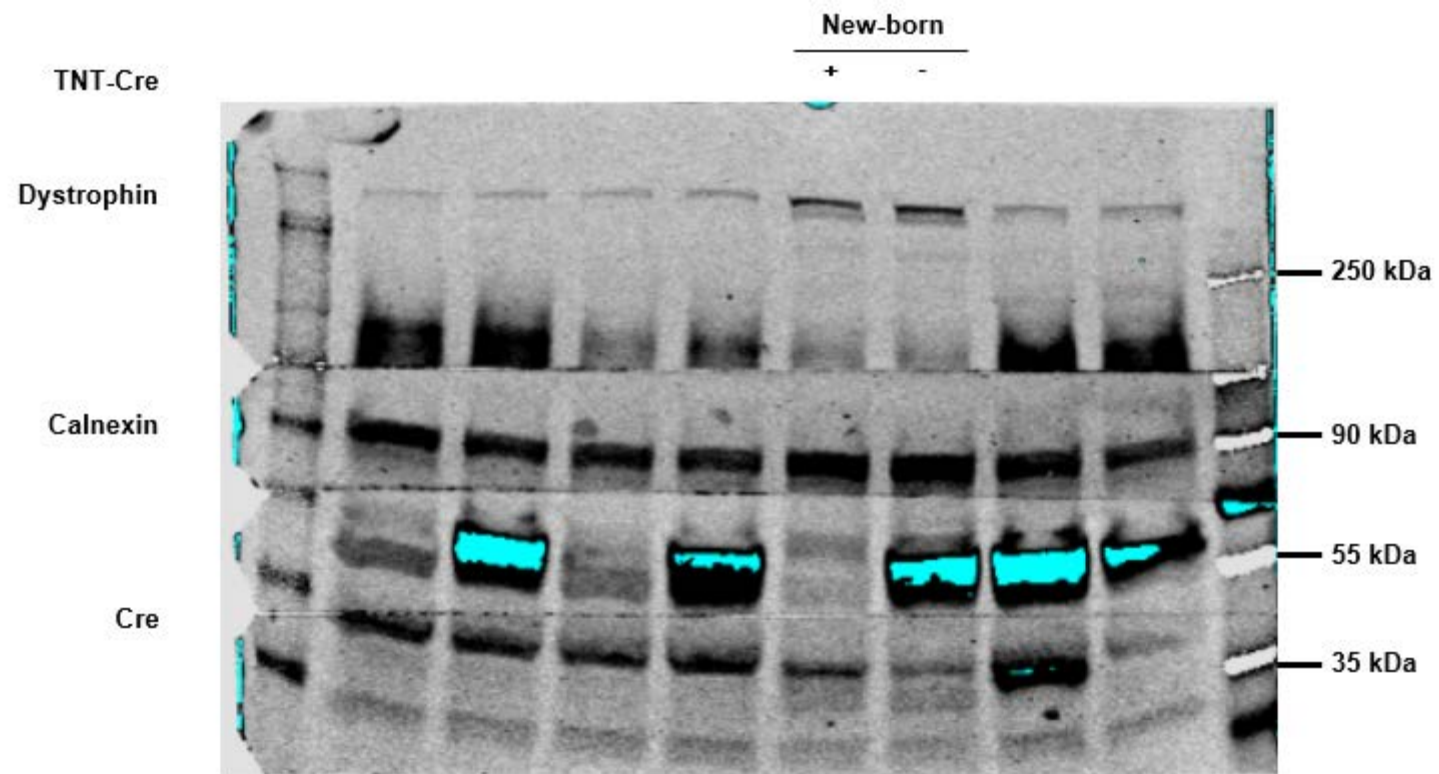

Supplement: 41598_2019_55950_MOESM1_ESM.pdf [file 41598_2019_55950_MOESM1_ESM.pdf]
